# Supplementary material for: Management of Chronic Myeloid Leukemia and Pregnancy: A Bibliometric Analysis (2000-2020)
Source: Front Oncol. 2022 Mar 7;12:826703. doi: 10.3389/fonc.2022.826703 (PMC8934933; doi:10.3389/fonc.2022.826703)
Supplement: Supplementary file 1 [file DataSheet_1.xlsx]

## Sheet: Sheet1
Institutions	Article	Degree	Sigma	Half-life
Univ London Imperial Coll Sci Technol & Med	4	1	1	5.5
Nat Res Cent Hematology, Moscow	4	5	1	1.5
Heidelberg Univ	3	6	1	6.5
Chongqing Med Univ	2	0	1	-0.5
Washington Univ	2	3	1	-0.5
Mem Sloan Kettering Canc Ctr	2	1	1	-0.5
S. Eugenio Hospital, Tor Vergata Univ Roma	2	1	1	-0.5
ELN Fdn	2	4	1	-0.5
Harvard Univ	2	4	1	9.5
Uludag Univ Hosp	2	0	1	0.5
Tel Aviv Univ	2	0	1	-0.5
Duke Univ	2	0	1	7.5
Univ Pecs	2	1	1	-0.5
Oregon Hlth & Sci Univ	2	1	1	-0.5
Hammersmith Hosp	2	4	1	10.5
Columbia Univ	2	0	1	8.5
Brigham & Womens Hosp	2	1	1	2.5
Dr Lutfi Kirdar Kartal Educ & Res Hosp	2	2	1	1.5
Tawam Hosp	2	1	1	-0.5
Brown Univ	2	1	1	1.5
Cairo Univ	2	0	1	5.5
Chaim Sheba Med Ctr	2	2	1	0.5
Univ Southern Calif	2	0	1	-0.5
Ctr Pharmaceut Analyt Ltd	2	1	1	-0.5
Univ Texas MD Anderson Canc Ctr	2	0	1	-0.5
Imperial Coll	2	4	1	-0.5
Cornell Univ	2	1	1	1.5
Serono Inc	1	0	1	-0.5
HUSHIMI Pharmatheut	1	0	1	-0.5
Uludag Univ	1	0	1	-0.5
Hosp Holbaek	1	0	1	-0.5
Referral Ctr Teaching Diagnost Imaging CETRUS	1	1	1	-0.5
Anhui Med Univ	1	0	1	-0.5
Aghia Sofia Childrens Hosp	1	2	1	-0.5
Karolinska Inst	1	3	1	-0.5
Barnes Jewish Hosp	1	3	1	-0.5
City Hope Comprehens Canc Ctr	1	3	1	-0.5
KromaTiD Inc	1	1	1	-0.5
Armed Forces Bone Marrow Transplant Ctr	1	0	1	-0.5
Jichi Med Sch	1	0	1	-0.5
Fonterra Res Ctr	1	0	1	-0.5
ASO S Croce & Carle	1	3	1	-0.5
Cytogenetique	1	0	1	-0.5
Catholic Univ	1	6	1	-0.5
Aligarh Muslim Univ	1	0	1	-0.5
Shanghai Jiao Tong Univ	1	0	1	-0.5
CNOOC Res Inst Ltd	1	0	1	-0.5
Hadassah Hebrew Univ Med Ctr	1	1	1	-0.5
Med Fac Carl Gustav Carus	1	0	1	-0.5
Cleveland Clin	1	3	1	-0.5
AOU Policlin Vittorio Emanuele	1	0	1	-0.5
CHA Univ	1	0	1	-0.5
Childrens Hosp Los Angeles	1	0	1	-0.5
Hosp Geral Santo Antonio	1	0	1	-0.5
Ataturk Univ	1	2	1	-0.5
Belfast City Hosp	1	0	1	-0.5
Shanghai Med Univ 2	1	1	1	-0.5
Dept Vet Affairs Med Ctr	1	1	1	-0.5
CHU Bordeaux	1	1	1	-0.5
Karolinska Hosp	1	3	1	-0.5
UCL	1	0	1	-0.5
Hamad Med Corp	1	0	1	-0.5
CNISM INFM	1	0	1	-0.5
Ankara Oncol Hosp	1	0	1	-0.5
Almazov Natl Res Ctr	1	6	1	-0.5
BCAM Basque Ctr Appl Math	1	2	1	-0.5
Aziza Othmana Univ Hosp	1	0	1	-0.5
Fac Med 1	1	0	1	-0.5
Fed Univ Sao Paulo EPM UNIFESP	1	1	1	-0.5
Aska Womens Clin	1	0	1	-0.5
Embryogenesis Assisted Concept Unit	1	2	1	-0.5
Hosp Duran & Reynals	1	0	1	-0.5
Hadassah Med Ctr	1	1	1	-0.5
Hop Hotel Dieu	1	3	1	-0.5
Aichi Med Univ	1	0	1	-0.5
AOU Careggi	1	3	1	-0.5
BioCruces Hlth Res Inst	1	0	1	-0.5
Allama Iqbal Med Coll	1	1	1	-0.5
Fujita Hlth Univ	1	0	1	-0.5
Erciyes Univ	1	2	1	-0.5
Ankara Univ	1	0	1	-0.5
Hop St Louis	1	3	1	-0.5
Novartis Pharmaceut	1	0	1	-0.5
Alturas Analyt Inc	1	1	1	-0.5
Augusta Univ	1	6	1	-0.5
AOU Policlin Messina	1	3	1	-0.5
Charles Univ Prague	1	1	1	-0.5
Natl Taiwan Univ	1	0	1	-0.5
Childrens Hosp Aglaia Kyriakou	1	2	1	-0.5
Univ Massachusetts	1	3	1	-0.5
Indian Council Med Res ICMR	1	0	1	-0.5
King Fahd Med City	1	1	1	-0.5
CIC bioGUNE	1	2	1	-0.5
Univ Texas	1	0	1	-0.5
Cedars Sinai Med Ctr	1	1	1	-0.5
Bristol Myers Squibb Co	1	2	1	-0.5
Univ Mersin	1	0	1	-0.5
Shanghai Inst Immunol	1	1	1	-0.5
Fernandez Hosp	1	0	1	-0.5
AO Citta Salute & Sci Torino	1	3	1	-0.5
Guys Hosp	1	0	1	-0.5
Comenius Univ	1	0	1	-0.5
ARUP Labs	1	1	1	-0.5
CLLARC	1	0	1	-0.5
Donauspital	1	3	1	-0.5
Roche Diagnost	1	1	1	-0.5
Colorado State Univ	1	1	1	-0.5
Catholic Univ Korea	1	0	1	-0.5
BCCA Vancouver Isl	1	0	1	-0.5
CIBERER U765	1	0	1	-0.5
Pochon CHA Univ	1	0	1	-0.5
Albert Einstein Coll Med	1	0	1	-0.5
Catholic Univ Louvain	1	0	1	-0.5
Austin Hosp	1	0	1	-0.5
