# Supplementary material for: Management of Chronic Myeloid Leukemia and Pregnancy: A Bibliometric Analysis (2000-2020)
Source: Front Oncol. 2022 Mar 7;12:826703. doi: 10.3389/fonc.2022.826703 (PMC8934933; doi:10.3389/fonc.2022.826703)
Supplement: Supplementary file 2 [file DataSheet_2.xlsx]

## Sheet: supplementary table S2
Rank	Journals	Articles	Zone
1	LEUKEMIA & LYMPHOMA	7	Zone 1
2	LEUKEMIA RESEARCH	7	Zone 1
3	JOURNAL OF ASSISTED REPRODUCTION AND GENETICS	5	Zone 1
4	AMERICAN JOURNAL OF HEMATOLOGY	4	Zone 1
5	PLOS ONE	4	Zone 1
6	ACTA HAEMATOLOGICA	3	Zone 1
7	INTERNAL MEDICINE	3	Zone 1
8	INTERNATIONAL JOURNAL OF MOLECULAR SCIENCES	3	Zone 1
9	JOURNAL OF ONCOLOGY PHARMACY PRACTICE	3	Zone 1
10	JOURNAL OF THE NATIONAL COMPREHENSIVE CANCER NETWORK	3	Zone 1
11	MEDITERRANEAN JOURNAL OF HEMATOLOGY AND INFECTIOUS DISEASES	3	Zone 1
12	TRANSFUSION AND APHERESIS SCIENCE	3	Zone 1
13	ACTA OBSTETRICIA ET GYNECOLOGICA SCANDINAVICA	2	Zone 1
14	ANNALS OF HEMATOLOGY	2	Zone 1
15	ANTICANCER RESEARCH	2	Zone 1
16	ARCHIVES OF GYNECOLOGY AND OBSTETRICS	2	Zone 1
17	BEST PRACTICE & RESEARCH CLINICAL OBSTETRICS & GYNAECOLOGY	2	Zone 1
18	BIOLOGY OF BLOOD AND MARROW TRANSPLANTATION	2	Zone 1
19	BIOMEDICAL PAPERS-OLOMOUC	2	Zone 1
20	BLOOD	2	Zone 1
21	BONE MARROW TRANSPLANTATION	2	Zone 1
22	BRITISH JOURNAL OF HAEMATOLOGY	2	Zone 2
23	CURRENT HEMATOLOGIC MALIGNANCY REPORTS	2	Zone 2
24	FERTILITY AND STERILITY	2	Zone 2
25	HUMAN REPRODUCTION	2	Zone 2
26	INDIAN JOURNAL OF HEMATOLOGY AND BLOOD TRANSFUSION	2	Zone 2
27	INTERNATIONAL JOURNAL OF ANDROLOGY	2	Zone 2
28	JOURNAL OF CLINICAL ONCOLOGY	2	Zone 2
29	JOURNAL OF HEMATOLOGY & ONCOLOGY	2	Zone 2
30	LANCET	2	Zone 2
31	NUTRITION RESEARCH	2	Zone 2
32	REPRODUCTIVE TOXICOLOGY	2	Zone 2
33	SEMINARS IN HEMATOLOGY	2	Zone 2
34	TRANSFUSION	2	Zone 2
35	TURKISH JOURNAL OF HEMATOLOGY	2	Zone 2
36	ACTA MEDICA MEDITERRANEA	1	Zone 2
37	ACTA MEDICA PORTUGUESA	1	Zone 2
38	ALCOHOL AND ALCOHOLISM	1	Zone 2
39	AMERICAN JOURNAL OF PERINATOLOGY	1	Zone 2
40	ANNALS OF ONCOLOGY	1	Zone 2
41	ANNALS OF SAUDI MEDICINE	1	Zone 2
42	ANTI-CANCER DRUGS	1	Zone 2
43	ANTIOXIDANTS	1	Zone 2
44	ARCHIVES OF IRANIAN MEDICINE	1	Zone 2
45	BEST PRACTICE & RESEARCH CLINICAL HAEMATOLOGY	1	Zone 2
46	BIOMEDICAL JOURNAL	1	Zone 2
47	BIRTH DEFECTS RESEARCH PART A-CLINICAL AND MOLECULAR TERATOLOGY	1	Zone 2
48	BJOG-AN INTERNATIONAL JOURNAL OF OBSTETRICS AND GYNAECOLOGY	1	Zone 2
49	BLOOD REVIEWS	1	Zone 2
50	BMC CANCER	1	Zone 2
51	BMJ OPEN	1	Zone 2
52	BRATISLAVA MEDICAL JOURNAL-BRATISLAVSKE LEKARSKE LISTY	1	Zone 2
53	CANCER	1	Zone 2
54	CANCER CAUSES & CONTROL	1	Zone 2
55	CANCER TREATMENT REVIEWS	1	Zone 2
56	CELL RESEARCH	1	Zone 2
57	CENTRAL EUROPEAN JOURNAL OF PHYSICS	1	Zone 2
58	CHILDS NERVOUS SYSTEM	1	Zone 2
59	CHROMOSOME RESEARCH	1	Zone 2
60	CLINICAL BIOCHEMISTRY	1	Zone 2
61	CLINICAL LABORATORY	1	Zone 2
62	CLINICAL LYMPHOMA & MYELOMA	1	Zone 2
63	CLINICAL LYMPHOMA MYELOMA & LEUKEMIA	1	Zone 2
64	CLINICAL OBSTETRICS AND GYNECOLOGY	1	Zone 2
65	CRITICAL REVIEWS IN ONCOLOGY HEMATOLOGY	1	Zone 2
66	CROATIAN MEDICAL JOURNAL	1	Zone 2
67	CURRENT OPINION IN HEMATOLOGY	1	Zone 2
68	DIABETES	1	Zone 2
69	DRUG SAFETY	1	Zone 2
70	ECOLOGICAL MODELLING	1	Zone 2
71	EUROPEAN JOURNAL OF HAEMATOLOGY	1	Zone 2
72	EXPERIMENTAL HEMATOLOGY	1	Zone 2
73	EXPERT REVIEW OF HEMATOLOGY	1	Zone 2
74	HAEMATOLOGICA	1	Zone 3
75	HEMATOLOGY-AMERICAN SOCIETY OF HEMATOLOGY EDUCATION PROGRAM	1	Zone 3
76	HEMATOLOGY-ONCOLOGY CLINICS OF NORTH AMERICA	1	Zone 3
77	HUMAN FERTILITY	1	Zone 3
78	IN VIVO	1	Zone 3
79	INDIAN JOURNAL OF PEDIATRICS	1	Zone 3
80	INTERNATIONAL JOURNAL OF ENVIRONMENTAL RESEARCH AND PUBLIC HEALTH	1	Zone 3
81	INTERNATIONAL JOURNAL OF GENOMICS	1	Zone 3
82	INTERNATIONAL JOURNAL OF GYNECOLOGICAL CANCER	1	Zone 3
83	INTERNATIONAL JOURNAL OF OBSTETRIC ANESTHESIA	1	Zone 3
84	IRISH JOURNAL OF MEDICAL SCIENCE	1	Zone 3
85	JAPANESE JOURNAL OF CLINICAL ONCOLOGY	1	Zone 3
86	JCPSP-JOURNAL OF THE COLLEGE OF PHYSICIANS AND SURGEONS PAKISTAN	1	Zone 3
87	JOURNAL OF ADVANCED RESEARCH	1	Zone 3
88	JOURNAL OF BIOMEDICINE AND BIOTECHNOLOGY	1	Zone 3
89	JOURNAL OF CANCER RESEARCH AND THERAPEUTICS	1	Zone 3
90	JOURNAL OF CHEMICAL NEUROANATOMY	1	Zone 3
91	JOURNAL OF CLEANER PRODUCTION	1	Zone 3
92	JOURNAL OF CLINICAL GASTROENTEROLOGY	1	Zone 3
93	JOURNAL OF CLINICAL MEDICINE	1	Zone 3
94	JOURNAL OF IMMUNOLOGICAL METHODS	1	Zone 3
95	JOURNAL OF LEUKOCYTE BIOLOGY	1	Zone 3
96	JOURNAL OF MATERNAL-FETAL & NEONATAL MEDICINE	1	Zone 3
97	JOURNAL OF NEMATOLOGY	1	Zone 3
98	JOURNAL OF OBSTETRICS AND GYNAECOLOGY	1	Zone 3
99	JOURNAL OF OBSTETRICS AND GYNAECOLOGY RESEARCH	1	Zone 3
100	JOURNAL OF PEDIATRIC HEMATOLOGY ONCOLOGY	1	Zone 3
101	JOURNAL OF PERINATOLOGY	1	Zone 3
102	JOURNAL OF REPRODUCTIVE IMMUNOLOGY	1	Zone 3
103	JOURNAL OF THE FORMOSAN MEDICAL ASSOCIATION	1	Zone 3
104	JOURNAL OF THE NATIONAL MEDICAL ASSOCIATION	1	Zone 3
105	JOURNAL OF THEORETICAL BIOLOGY	1	Zone 3
106	KLINISCHE PADIATRIE	1	Zone 3
107	LANCET ONCOLOGY	1	Zone 3
108	LEUKEMIA	1	Zone 3
109	MATHEMATICAL BIOSCIENCES	1	Zone 3
110	MEDICAL ONCOLOGY	1	Zone 3
111	MEDICAL PRINCIPLES AND PRACTICE	1	Zone 3
112	MEDICAL SCIENCE MONITOR	1	Zone 3
113	NATURE REVIEWS CLINICAL ONCOLOGY	1	Zone 3
114	NATURE REVIEWS UROLOGY	1	Zone 3
115	NETHERLANDS JOURNAL OF MEDICINE	1	Zone 3
116	NEUROLOGY	1	Zone 3
117	OBSTETRICS AND GYNECOLOGY	1	Zone 3
118	ONCOLOGIST	1	Zone 3
119	ONCOLOGY RESEARCH AND TREATMENT	1	Zone 3
120	PARASITOLOGY INTERNATIONAL	1	Zone 3
121	PATIENT PREFERENCE AND ADHERENCE	1	Zone 3
122	PEDIATRIC BLOOD & CANCER	1	Zone 3
123	PEDIATRIC TRANSPLANTATION	1	Zone 3
124	PHARMACEUTICAL RESEARCH	1	Zone 3
125	PHARMACOGENOMICS	1	Zone 3
126	PHYSIOLOGICAL RESEARCH	1	Zone 3
127	PLACENTA	1	Zone 3
128	PRENATAL DIAGNOSIS	1	Zone 3
129	REPRODUCTION	1	Zone 3
130	SCIENTIFIC REPORTS	1	Zone 3
131	SPRINGERPLUS	1	Zone 3
132	TARGETED ONCOLOGY	1	Zone 3
133	THERAPEUTIC ADVANCES IN HEMATOLOGY	1	Zone 3
134	THERAPEUTICS AND CLINICAL RISK MANAGEMENT	1	Zone 3
135	TOXICOLOGY AND APPLIED PHARMACOLOGY	1	Zone 3
136	TOXICOLOGY IN VITRO	1	Zone 3
137	TRANSFUSION MEDICINE AND HEMOTHERAPY	1	Zone 3
