# Supplementary material for: Management of Chronic Myeloid Leukemia and Pregnancy: A Bibliometric Analysis (2000-2020)
Source: Front Oncol. 2022 Mar 7;12:826703. doi: 10.3389/fonc.2022.826703 (PMC8934933; doi:10.3389/fonc.2022.826703)
Supplement: Supplementary file 4 [file DataSheet_4.xlsx]

## Sheet: Sheet1
Word	Dim.1	Dim.2	Topic
chronic.myelogenous.leukemia	0.4	0.68	1
chronic.myeloid.leukemia	-0.43	0.52	1
imatinib	0.52	0.51	1
pregnancy	0.48	-0.36	1
management	0.76	0.39	1
therapy	0.36	0.11	1
patient	0.03	0.23	1
cml	0.81	0.4	1
imatinib.mesylate	0.82	0.47	1
leukapheresis	0.46	0.49	1
c.kit	0.12	0.22	1
essential.thrombocythemia	-0.87	0.82	1
follow.up	0.77	0.61	1
hydroxyurea	0.1	0.95	1
bone.marrow.transplantation	-0.65	-0.1	1
children	-0.29	0.07	1
chronic.myelocytic.leukemia	0.08	1.26	1
interferon	0.41	0.32	1
stem.cell.transplantation	0.72	0.46	1
growth	0.61	-0.13	1
safety	0.62	0.39	1
chemotherapy	-0.59	0.12	1
fetal	-0.09	0.62	1
interferon.alpha	-0.06	1.39	1
stem.cells	0.62	-0.74	1
total.body.irradiation	-1.27	-0.22	1
alpha.interferon	-0.09	0.78	1
mesylate	0.3	-0.26	1
outcomes	0.22	-0.23	1
tyrosine.kinase	0.48	-0.33	1
X1st.trimester	-0.86	0.19	1
breast.cancer	-0.65	-0.04	1
patients.receiving.imatinib	0.16	0.42	1
receiving.imatinib	1.13	-0.05	1
relapse	0.84	0.1	1
tyrosine.kinases	0.13	0.95	1
cancer	-0.27	-0.33	2
disease	-0.4	-0.76	2
expression	-0.05	-0.88	2
receptor	-0.41	-0.58	2
risk	0.18	-0.88	2
fertility.preservation	-0.56	-1.18	2
women	-0.52	-0.98	2
lymphoma	-0.75	-0.82	2
oxidative.stress	-0.5	-1.18	2
cells	-0.45	-0.53	2
fertility	0.01	-1.11	2
hodgkins.disease	-0.55	-1.53	2
protein	-0.5	-1.28	2
cryopreservation	-0.42	-1.87	2
failure	-0.84	-0.87	2
in.vitro	-0.31	-0.67	2
insulin.resistance	-0.57	-1.25	2
resistance	-0.51	-0.75	2
spermatogenesis	-0.19	-1.14	2
transplantation	-0.19	-1.7	2
dasatinib	1.76	0.48	3
discontinuation	1.28	0.75	3
cml.patients	1.81	0.6	3
nilotinib	2.09	0.64	3
treatment.free.remission	2.18	0.53	3
tyrosine.kinase.inhibitors	1.92	0.35	3
chronic.phase	1.31	0.67	3
complete.molecular.remission	1.2	0.57	3
recommendations	1.97	-0.07	3
molecular.response	2.61	0.77	3
impact	1.61	0.21	3
quality.of.life	1.68	0.31	3
remission	1.7	0.76	3
survival	2.06	-0.18	3
