# Supplementary material for: Management of Chronic Myeloid Leukemia and Pregnancy: A Bibliometric Analysis (2000-2020)
Source: Front Oncol. 2022 Mar 7;12:826703. doi: 10.3389/fonc.2022.826703 (PMC8934933; doi:10.3389/fonc.2022.826703)
Supplement: Supplementary file 5 [file DataSheet_5.xlsx]

## Sheet: Sheet1
id	label	x	y	cluster	weight<Links>	weight<Total link strength>	weight<Occurrences>	score<Avg. pub. year>	score<Avg. citations>	score<Avg. norm. citations>
47	ages	1.0915	-0.3881	1	9	16	6	2009.83	36	1.3772
57	alpha-interferon	-0.1941	-0.7023	3	14	22	5	2008.2	54	1.7395
103	blast crisis	-0.4954	0.5162	2	18	21	5	2011.4	59.6	1.08
113	bone-marrow-transplantation	0.6028	0.2381	1	21	33	10	2009.8	21.8	0.7324
126	c-kit	0.1126	-0.352	2	26	61	13	2014.69	23.6154	1.0515
129	cancer	0.4146	0.3437	1	32	78	18	2011.78	33.1111	1.3224
149	cells	0.4071	-0.5092	1	10	11	5	2013.2	19.4	0.9107
183	chronic myelogenous leukemia	-0.5191	-0.1512	2	44	312	71	2012.1	29.5915	1.1686
191	chronic-phase	-0.6493	-0.0022	2	21	35	6	2014	25.6667	1.1354
200	cml	-0.067	-0.2219	2	43	182	34	2013.82	17.2941	0.9713
203	cml patients	-1.0197	0.0275	2	30	77	13	2018.15	12	1.1581
209	complete molecular remission	-0.4214	0.3775	2	23	43	6	2017	16.8333	1.4333
228	cryopreservation	0.7434	0.5502	1	14	30	6	2008.67	74.3333	2.9621
239	dasatinib	-0.9357	0.2753	2	35	156	24	2017.17	12.625	1.2068
262	discontinuation	-0.6618	0.2407	2	33	106	16	2016.94	15.125	1.4544
264	disease	0.3903	-0.1964	1	26	35	9	2012.89	34.2222	1.446
301	essential thrombocythemia	0.1674	-0.7583	3	19	47	12	2010.08	35.5833	1.087
311	expression	0.5578	-0.2691	1	19	26	9	2015.78	18.5556	1.1092
320	fertility	0.5247	-0.0872	1	38	67	14	2013.14	41.6429	1.2357
321	fertility preservation	0.785	0.345	1	25	52	11	2014.45	43.5455	1.7754
333	follow-up	-0.8561	0.6511	2	25	59	12	2014.58	37.3333	1.4457
376	growth	-0.2064	-0.0127	2	21	33	8	2013.25	22.25	1.0294
414	hodgkins-disease	0.6181	0.7345	1	12	22	5	2006.2	49	1.375
426	hydroxyurea	-0.6033	-0.8575	3	21	66	15	2009.13	28.6	0.8547
443	imatinib	-0.6767	-0.2984	2	40	253	52	2014.65	15.6346	0.9282
445	imatinib mesylate	-0.4452	-0.3483	2	34	100	21	2014.43	18.5714	1.2219
471	infertility	0.7186	0.1965	1	17	24	7	2010.29	15	0.6813
484	interferon	-1.035	-0.7609	3	17	52	10	2014.7	9.1	0.8282
486	interferon-alpha	-0.1814	-0.4625	3	23	43	8	2009.88	36.125	1.2656
513	leukapheresis	-0.4345	-0.626	3	27	93	17	2013.12	15.5294	0.769
514	leukemia	0.2465	0.5584	1	28	61	11	2011	47.0909	1.8265
535	lymphoma	0.5901	0.5102	1	24	57	12	2009.17	54.4167	1.4474
554	management	-0.8801	-0.3604	3	34	172	31	2014.39	15.4516	0.8773
573	mesylate	-0.1095	0.1739	2	18	28	5	2013.6	13.8	0.788
598	molecular response	-1.103	0.1944	2	22	53	7	2018	19.4286	2.0969
643	nilotinib	-0.7496	0.4419	2	29	97	13	2017.31	14.5385	1.3667
677	outcomes	-0.1738	0.7669	3	16	26	6	2013.17	10	0.5983
685	oxidative stress	1.0468	-0.2536	1	9	14	8	2014.75	16.625	0.8751
693	patient	-0.0166	-0.6695	3	31	108	21	2012.86	17.5238	0.794
750	pregnancy	0.0323	-0.0831	3	50	412	90	2012.56	20.6444	0.9521
767	protein	0.8282	-0.0244	1	7	7	5	2014.4	9.8	0.5141
782	rage	1.1614	-0.3216	1	8	15	6	2013.67	26.6667	1.1282
789	receptor	0.9343	-0.2935	1	14	25	9	2014.11	23.6667	1.1048
792	recommendations	-0.2141	0.5716	2	24	47	6	2016.5	51.3333	2.8284
804	reproduction	1.017	-0.1008	1	12	15	5	2013.8	10	0.5077
815	risk	0.3974	0.059	1	30	44	9	2016.11	24	1.7632
866	stem-cell transplantation	-0.5071	0.1015	2	20	34	8	2013.12	19.625	0.9076
867	stem-cells	0.1484	0.2453	1	22	29	6	2017.33	13.1667	1.4497
910	therapy	-0.2968	-0.2097	3	40	132	26	2011.62	20.7692	1.0494
920	total-body irradiation	0.9286	0.2875	1	9	16	6	2006.5	59	1.1437
930	transplantation	0.4656	0.552	1	21	31	5	2012.6	88	3.8476
934	treatment-free remission	-1.1823	0.46	2	21	62	9	2018.89	29.5556	2.2165
941	tyrosine kinase	-0.2575	0.3375	2	21	25	5	2015	13.2	1.2699
944	tyrosine kinase inhibitors	-0.8261	-0.0904	2	36	135	23	2015.65	24.4348	1.385
972	women	0.7881	-0.3452	1	19	30	8	2011.38	39.75	1.8074
